# Supplementary material for: The l-lysine-assisted synthesis of a nano-ZSM-5 zeolite as a catalyst for oleic acid pyrolysis to BTX
Source: Royal Society of Chemistry journal article supplement (doi:10.1039/d4nj02055c), 2024-01-01
Supplement: d4nj02055c1.pdf [file d4nj02055c1.pdf]

## **The L-lysine-assisted synthesis of a nano-ZSM-5 zeolite as a catalyst for oleic acid pyrolysis to BTX**

Sen Fu<sup>1</sup>, Hanxu Guo<sup>1</sup>, Hong Yuan<sup>1,2,3\*</sup>

1 School of Chemistry and Chemical Engineering, North Minzu University, Yinchuan 750021, China

2 Key Laboratory for Chemical Engineering and Technology, State Ethnic Affairs Commission, North Minzu University, Yinchuan 750021, China

3 Ningxia Key Laboratory of Solar Chemical Conversion Technology, North Minzu University, Yinchuan, 750021, China

**\*Corresponding author:** Hong Yuan, yuanhong@nun.edu.cn

Sen Fu, 1450320782@qq.com

Hanxu Guo, 1337983258@qq.com

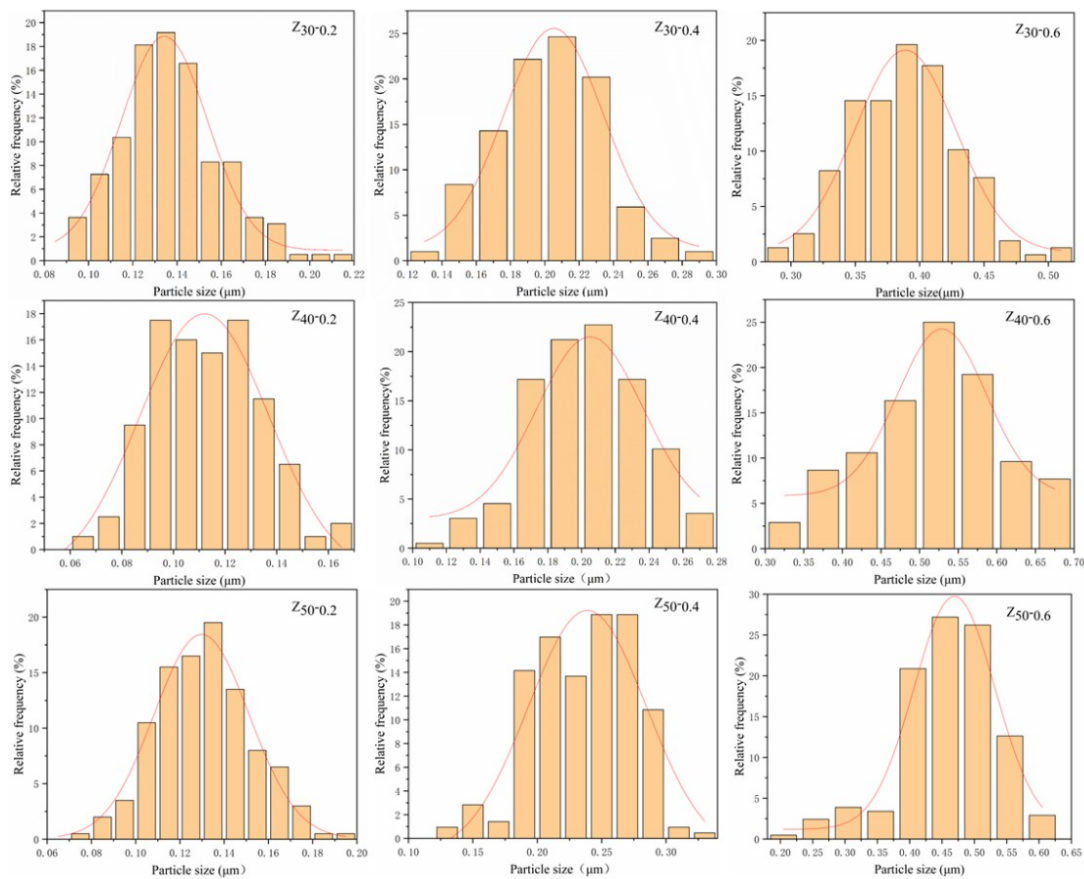

Figure S1. particle size distribution profiles of Z<sub>C-S</sub> zeolites.

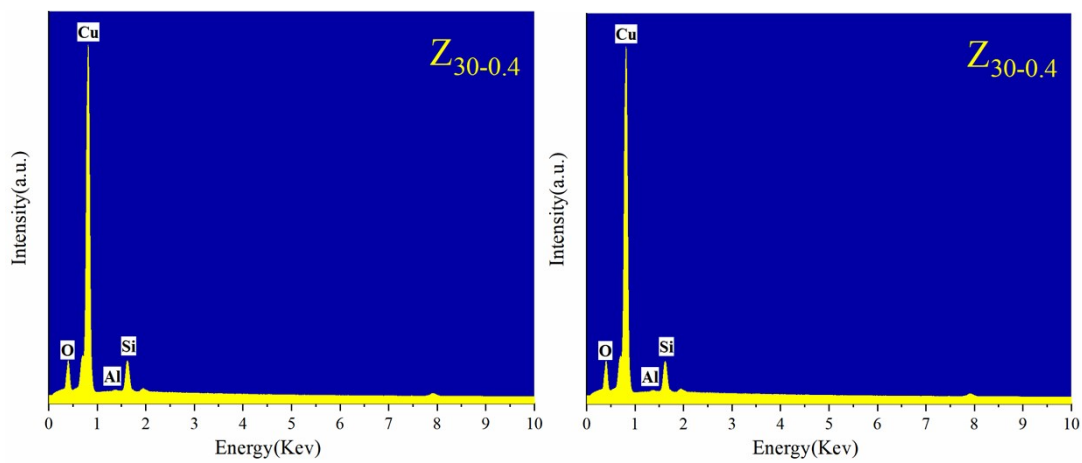

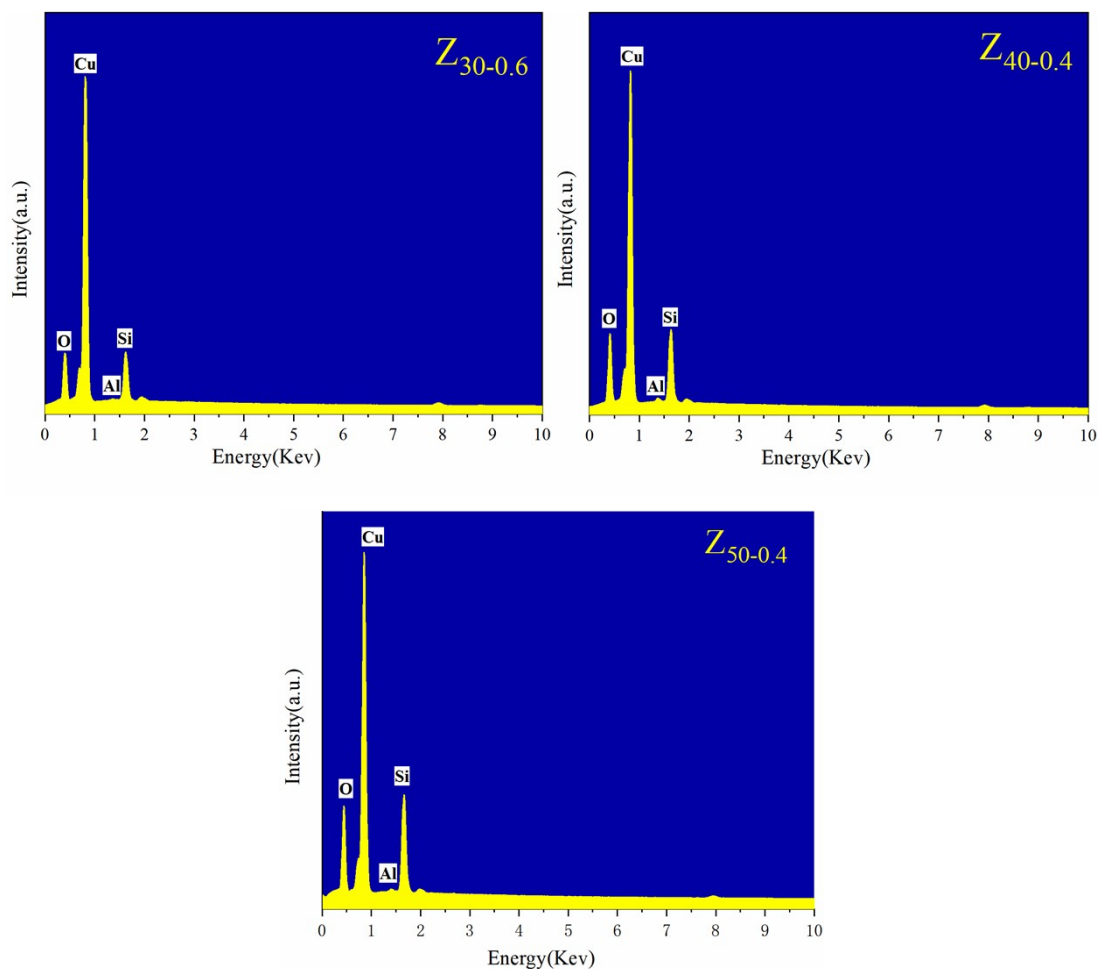

**Figure S2.** EDX spectra of the  $Z_{C-S}$  zeolites.

| sample       | EDX (At%) <sup>a</sup> |       |      |       | EA (%) <sup>a</sup> | EA (%) <sup>b</sup> |
|--------------|------------------------|-------|------|-------|---------------------|---------------------|
|              | O                      | Si    | Al   | total | N                   | N                   |
| $Z_{30-0.2}$ | 67.90                  | 31.02 | 1.08 | 100   | 0                   | 5.01                |
| $Z_{30-0.4}$ | 65.48                  | 33.04 | 1.12 | 100   | 0                   | 6.69                |
| $Z_{30-0.6}$ | 67.26                  | 31.75 | 0.99 | 100   | 0                   | 7.94                |
| $Z_{40-0.4}$ | 66.68                  | 32.51 | 0.81 | 100   | 0                   | 6.68                |
| $Z_{50-0.4}$ | 65.69                  | 33.65 | 0.66 | 100   | 0                   | 6.60                |

**Table S1.** The EDX and elemental analysis EA data of the samples.

<sup>a</sup> calcined samples

<sup>b</sup> as-prepared samples (uncalcined samples)

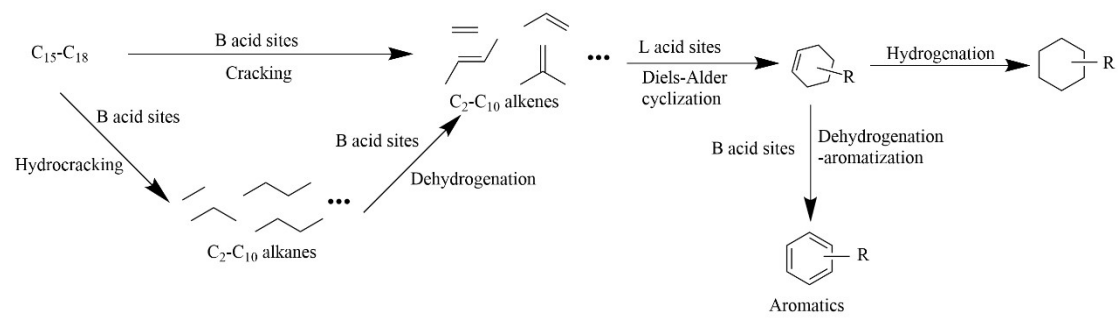

**Figure S3.** Catalytic pyrolysis mechanism.
